# Supplementary material
Source: MDPI journal article supplement (https://www.mdpi.com/2308-3417/9/2/30)
Supplement: s1 [file s1]

**Table S1.** Diffusion parameters of the arcuate fasciculus.

|           | <b>Broca's area (L)</b> | <b>Broca's area (R)</b> | <b>Wernicke's area (L)</b> | <b>Wernicke's area (R)</b> |
|-----------|-------------------------|-------------------------|----------------------------|----------------------------|
| <b>FA</b> | <b>0.282815</b>         | 0.358052                | 0.319494                   | 0.338662                   |
| <b>MD</b> | 0.000874                | 0.000783                | 0.000894                   | 0.000829                   |
| <b>FN</b> | 1024                    | 1024                    | 1024                       | 1024                       |

Anatomical region-of-interest seeds were placed in the left (L) Broca's and Wernicke's areas. The values of the contralateral side (R) are presented as reference. FA, Fractional anisotropy; MD, Mean diffusivity; FN, Fiber number.
